# Supplementary material for: Basal Values of Biochemical and Hematological Parameters in Elite Athletes
Source: MDPI journal article supplement (doi:10.3390/ijerph19053059), 2022-03-05
Supplement: s1 [file ijerph-1587447-supplementary.pdf › ijerph-1587447-supplementary.pdf]

**Table S1.** List of sport federations included in this study.

| Federations        | Male        |             |                     | Female      |             |                     |
|--------------------|-------------|-------------|---------------------|-------------|-------------|---------------------|
|                    | Samples     | Athletes    | Age                 | Samples     | Athletes    | Age                 |
| Athletics          | 1871        | 318         | 25.18 ± 6.35        | 1396        | 189         | 25.12 ± 5.46        |
| Badminton          | 127         | 25          | 21.10 ± 4.38        | 98          | 10          | 21.07 ± 2.56        |
| Basketball         | 564         | 250         | 27.13 ± 9.17        | 251         | 125         | 23.83 ± 5.67        |
| Handball           | 38          | 29          | 29.55 ± 5.59        | 87          | 75          | 22.34 ± 5.56        |
| Boxing             | 246         | 55          | 24.82 ± 8.37        | 56          | 26          | 25.41 ± 3.83        |
| Cycling            | 272         | 158         | 27.39 ± 7.05        | 48          | 26          | 27.00 ± 6.58        |
| Orienteering sport | 125         | 38          | 24.35 ± 6.98        | 41          | 21          | 21.34 ± 6.51        |
| Paralympic Sports  | 686         | 201         | 29.56 ± 8.92        | 236         | 48          | 25.62 ± 7.47        |
| Winter sports      | 165         | 44          | 22.38 ± 5.08        | 75          | 20          | 22.33 ± 4.72        |
| Fencing            | 75          | 39          | 21.95 ± 4.58        | 56          | 25          | 21.21 ± 2.48        |
| Football           | 133         | 95          | 29.66 ± 7.64        | 30          | 29          | 24.70 ± 4.44        |
| Gymnastics         | 145         | 28          | 23.37 ± 6.97        | 164         | 49          | 21.06 ± 5.21        |
| Golf               | 46          | 21          | 30.57 ± 15.04       | 34          | 20          | 20.62 ± 4.92        |
| Weightlifting      | 171         | 22          | 22.06 ± 2.85        | 179         | 15          | 23.08 ± 4.22        |
| Grass hockey       | 84          | 51          | 24.61 ± 5.09        | 345         | 56          | 24.00 ± 3.77        |
| Judo               | 224         | 71          | 23.68 ± 5.13        | 162         | 58          | 24.28 ± 5.79        |
| Karate             | 94          | 28          | 23.52 ± 5.34        | 65          | 20          | 23.68 ± 5.91        |
| Olympic fight      | 119         | 46          | 22.29 ± 4.54        | 57          | 17          | 22.81 ± 3.93        |
| Mountaineering     | 72          | 44          | 26.07 ± 8.74        | 42          | 26          | 27.14 ± 5.64        |
| Motorcycling       | 5           | 5           | 19.40 ± 2.19        | 1           | 1           | 20 (*)              |
| Swimming           | 636         | 168         | 22.14 ± 5.64        | 458         | 128         | 22.42 ± 4.11        |
| Canoeing           | 921         | 97          | 23.41 ± 5.11        | 378         | 61          | 22.09 ± 4.00        |
| Rowing             | 337         | 69          | 24.78 ± 5.03        | 120         | 39          | 25.53 ± 5.43        |
| Rugby              | 194         | 69          | 25.93 ± 3.91        | 589         | 98          | 24.98 ± 4.71        |
| Taekwondo          | 159         | 25          | 23.16 ± 4.50        | 48          | 12          | 24.96 ± 6.34        |
| Tennis             | 1           | 1           | 21.00 (*)           | 3           | 2           | 21.67 ± 3.21        |
| Table tennis       | 56          | 20          | 21.80 ± 4.29        | 2           | 1           | 25.00 ± 0.00        |
| Archery            | 48          | 16          | 21.71 ± 2.67        | 42          | 14          | 20.36 ± 2.06        |
| Olympic shot       | 59          | 24          | 26.14 ± 6.08        | 59          | 18          | 23.69 ± 6.06        |
| Triathlon          | 535         | 93          | 23.23 ± 5.70        | 317         | 43          | 25.79 ± 7.64        |
| Sailing            | 101         | 45          | 28.77 ± 6.02        | 74          | 25          | 26.95 ± 5.21        |
| Volleyball         | 143         | 63          | 25.15 ± 4.15        | 45          | 33          | 24.57 ± 4.93        |
| <b>Total</b>       | <b>8452</b> | <b>2258</b> | <b>24.93 ± 6.87</b> | <b>5558</b> | <b>1330</b> | <b>24.13 ± 5.49</b> |

(\*) Only one data.

**Table S2.** Analytical variation coefficient of biochemical parameters analyzed on Beckman AU400 clinical chemistry analyzer.

|                                  | Analytical CV (%) |
|----------------------------------|-------------------|
| Glucose (Glc)                    | 2.59              |
| Urea                             | 2.01              |
| Creatinine (CREA)                | 1.66              |
| Uric acid (UA)                   | 1.53              |
| Total cholesterol (CHOL)         | 2.13              |
| Triglycerides (TG)               | 3.26              |
| Total protein (TP)               | 2.28              |
| Albumin (Alb)                    | 2.74              |
| Creatine kinase (CK)             | 2.24              |
| Aspartate aminotransferase (AST) | 2.02              |
| Alanine aminotransferase (ALT)   | 1.62              |
| Gamma-glutamyltransferase (GGT)  | 1.79              |
| Lactate dehydrogenase (LDH)      | 2.60              |
| Sodium (Na)                      | 0.59              |
| Potassium (K)                    | 1.26              |
| Chloride (Cl)                    | 0.66              |
| Calcium (Ca)                     | 2.73              |
| Inorganic Phosphate (Phos)       | 1.92              |
| Magnesium (Mg)                   | 2.75              |
| Iron (Fe)                        | 3.16              |
| Total bilirubin (TBIL)           | 2.13              |

**Table S3.** Analytical variation coefficient of hematological parameters analyzed on Siemens Advia 120 hematological analyzer.

|                                                    | Analytical CV (%) |
|----------------------------------------------------|-------------------|
| Erythrocytes (RBC)                                 | 1.05              |
| Hemoglobin (Hb)                                    | 0.90              |
| Hematocrit (Hct)                                   | 1.24              |
| Mean Cell Volume (MCV)                             | 0.67              |
| Mean Cell hemoglobin (MCH)                         | 1.41              |
| Mean Cell hemoglobin concentration (MCHC)          | 1.52              |
| Red cell distribution wide (RDW)                   | 1.09              |
| Hemoglobin distribution wide (HbDW)                | 1.90              |
| Total leukocytes (WBC)                             | 2.34              |
| Lymphocytes                                        | 3.46              |
| Neutrophils                                        | 2.06              |
| Monocytes                                          | 8.00              |
| Eosinophils                                        | 11.18             |
| Basophils                                          | 24.18             |
| Large unstained cells (LUC)                        | 16.93             |
| Platelets (Plt)                                    | 3.13              |
| Mean platelet volume (MPV)                         | 1.86              |
| Plateletcrit (Pct)                                 | 3.83              |
| Platelet volume distribution width (PDW)           | 5.18              |
| Reticulocyte count (Rtc)                           | 10.03             |
| Reticulocyte percentage (Rtc%)                     | 9.73              |
| Mean reticulocyte volume (MCVr)                    | 1.35              |
| Mean reticulocyte corpuscular hemoglobin (MCHr)    | 0.77              |
| High fluorescence reticulocyte population (RETH)   | 38.52             |
| Medium fluorescence reticulocyte population (RETM) | 15.33             |
| Low fluorescence reticulocyte population (RETL)    | 2.51              |
